# Supplementary material for: Modulating Linker Composition of Haptens Resulted in Improved Immunoassay for Histamine
Source: Biomolecules. 2019 Oct 11;9(10):597. doi: 10.3390/biom9100597 (PMC6843301; doi:10.3390/biom9100597)
Supplement: Supplementary file 1 [file biomolecules-09-00597-s001.pdf]

## **Supplementary Materials**

### **Modulating Linker Composition of Haptens Resulted in Improved Immunoassay for Histamine**

Lin Luo<sup>a</sup>, Xiao-Qun Wei<sup>a</sup>, Bao-Zhu Jia<sup>b</sup>, Jin-Yi Yang<sup>a</sup>, Yu-Dong Shen<sup>a</sup>, Bruce

Hammock<sup>c</sup>, Jie-Xian Dong<sup>c</sup>, Hong Wang<sup>a</sup>, Hong-Tao Lei<sup>a</sup>, Zhen-Lin Xu<sup>a,\*</sup>

<sup>a</sup> Guangdong Provincial Key Laboratory of Food Quality and Safety, South China

Agricultural University, Guangzhou 510642, China

<sup>b</sup> College of Biology and Food Engineering, Guangdong University of Education,

Guangzhou 510303, China

<sup>c</sup> Department of Entomology and Nematology and UCD Comprehensive Cancer

Center, University of California Davis, Davis, CA 95616, USA

#### **Contents:**

1. Animals and Reagents.
2. Instruments.
3. ELISA Protocol
4. Figure S1~S3, Table S1, Table S2 and Table S3
9. References

**1. Animals and Reagents.** Histamine dihydrochloride, L-histidine, L-tryptophan, tryptamine hydrochloride, tyramine hydrochloride, phenethylamine hydrochloride, cadaverine hydrochloride, 4-(2-aminoethyl) benzoic acid, 4-(aminomethyl) benzoic acid, 4-aminobutyric acid, acryloyl chloride, diethyl dicarbonate (DEPC) were obtained from Heowns Biochem Technologies Co. Ltd. (Tianjin, China). sodium borohydride ( $\text{NaBH}_4$ ), dimethylformamide (DMF), 1-(3-Dimethylaminopropyl)-3-ethylcarbodiimide hydrochloride (EDC) and triethylamine were obtained from Aladdin Chemical Technology Co., Ltd. (Shanghai, China). Histamine, 3,3',5,5'-tetramethylbenzidine (TMB), glutaraldehyde (50%, v/v), complete and incomplete Freund's adjuvants, Keyhole Limpet Hemocyanin (KLH), bovine serum albumin (BSA), ovalbumin (OVA), horseradish peroxidase and peroxidase-labelled goat anti-rabbit IgG (secondary antibody) were obtained from Sigma-Aldrich (St. Louis, MO, USA). *N,N*-Dimethylformamide (DMF), acetonitrile (ACN), Tween-20, ethanol, methanol (MeOH), ethyl acetate (EtOAc), tetrahydrofuran (THF) and chloroform ( $\text{CHCl}_3$ ) were obtained from Damao Chemical Reagent Co., Ltd. (Tianjin, China). BABL/c female mice aged 7 weeks were supplied by the Guangdong Medical Experimental Animal Centre. 96-well polystyrene micro-plates were obtained from Shenzhen Jinchuanhua Industrial Co. Ltd. (Shenzhen, China). All other reagents were of analytical reagent grade or higher purity.

**2. Instruments.** ELISA Plates were washed in a Multiskan MK2 microplate washer (Thermo Scientific, Hudson, NH, USA). Absorbance was measured at a wavelength of 450 nm using a Multiskan MK3 microplate reader (Thermo Scientific). Ultraviolet

spectrometry (UV) was recorded on a UV-3010 spectrophotometer (Hitachi, Tokyo, Japan). LC–MS/MS analysis was carried out by using the 1200 series LC system (Agilent Technologies) equipped with the Agilent 6410 Triple Quad LC–MS System (Agilent Technologies). Nuclear magnetic resonance (NMR) spectra were achieved with either a DRX-400 or DRX-600 NMR spectrometer (Bruker, Rheinstetten, Germany).

### **3. ELISA protocol**

The coating antigens (100 µL/well) diluted in carbonate buffer (50 mmol/L, pH 9.6) were added into microplates and incubated overnight at 37 °C. The microplates were then washed twice, and the blocking solution (200 µL/well) was added to block the unbound active sites at 37 °C for 3 h, and dried at 37 °C for 1 h. 50 µL of target analyte standards or diluted sample solutions and 50 µL of diluted anti-hapten antibodies in PBST were added into each well and incubated at 37 °C for 40 min. and then the wells were washed five times. 100 µL of HRP labeled secondary antibody (diluted 1:5000 in PBST) was then added to the each well and incubated for 40 min at 37 °C. The wells were washed again for five times before the addition of 100 µL of TMB-based substrate solution. The enzymatic chromogenic reaction proceeds for 12 min and was stopped by adding 50 µL of 2 M H<sub>2</sub>SO<sub>4</sub>. Finally, absorbance at 450 nm was recorded. The percentage inhibition percentage used to characterize the binding ability of antibodies to target molecule was calculated using the following formula: inhibition (%) = [1 – (B/B<sub>0</sub>)] × 100; Where B<sub>0</sub> represented the mean absorbance of the wells free from competitor (target analyte) ; B represented the mean absorbance of wells in the presence

of a certain level of competitor. Plotting  $B/B_0$  (Y axis) against the logarithm of the target analyte concentration (X axis) yielded inhibition curve. A four-parameter logistic equation was adopted to fit the sigmoidal curve using Origin 8.6 software (Origin Lab Corp., Northampton, MA):  $Y = (A - D) / [1 + (x/C)^B] + D$ , where A is the maximum response at high asymptotes of the curve, D is the minimum response at low asymptotes of the curve, C is the concentration of the analyte that lead to 50% inhibition, and E is the slope of sigmoidal curve. The limit of detection (LOD) was defined as the concentration of analyte that produce 10% inhibition ( $IC_{10}$ ).

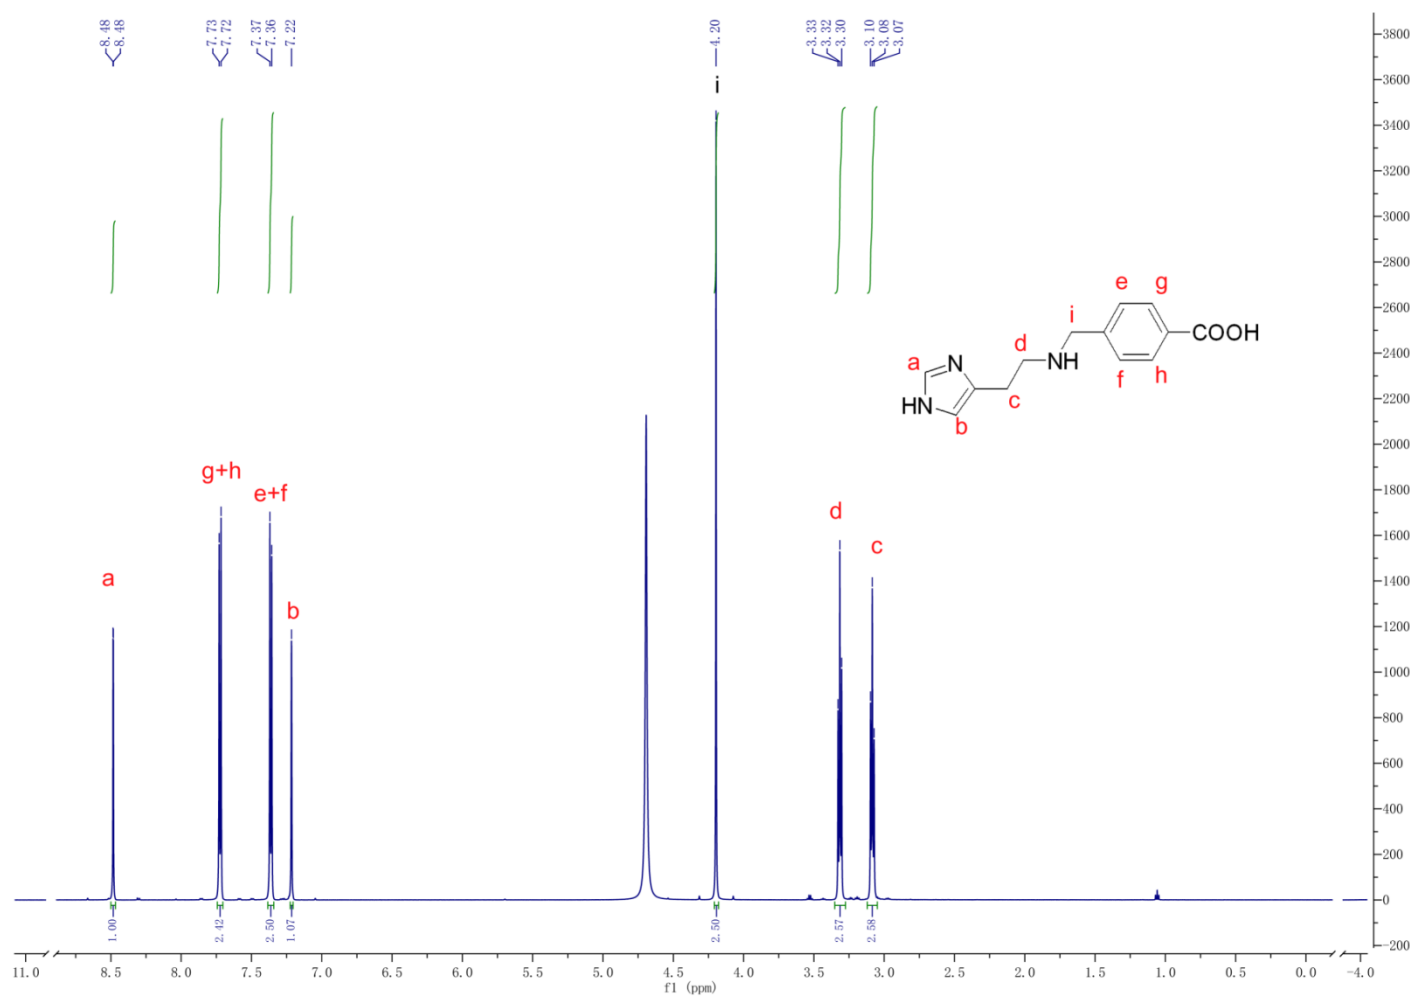

**Figure S1.**  $^1\text{H}$  NMR spectrum of hapten HA-245

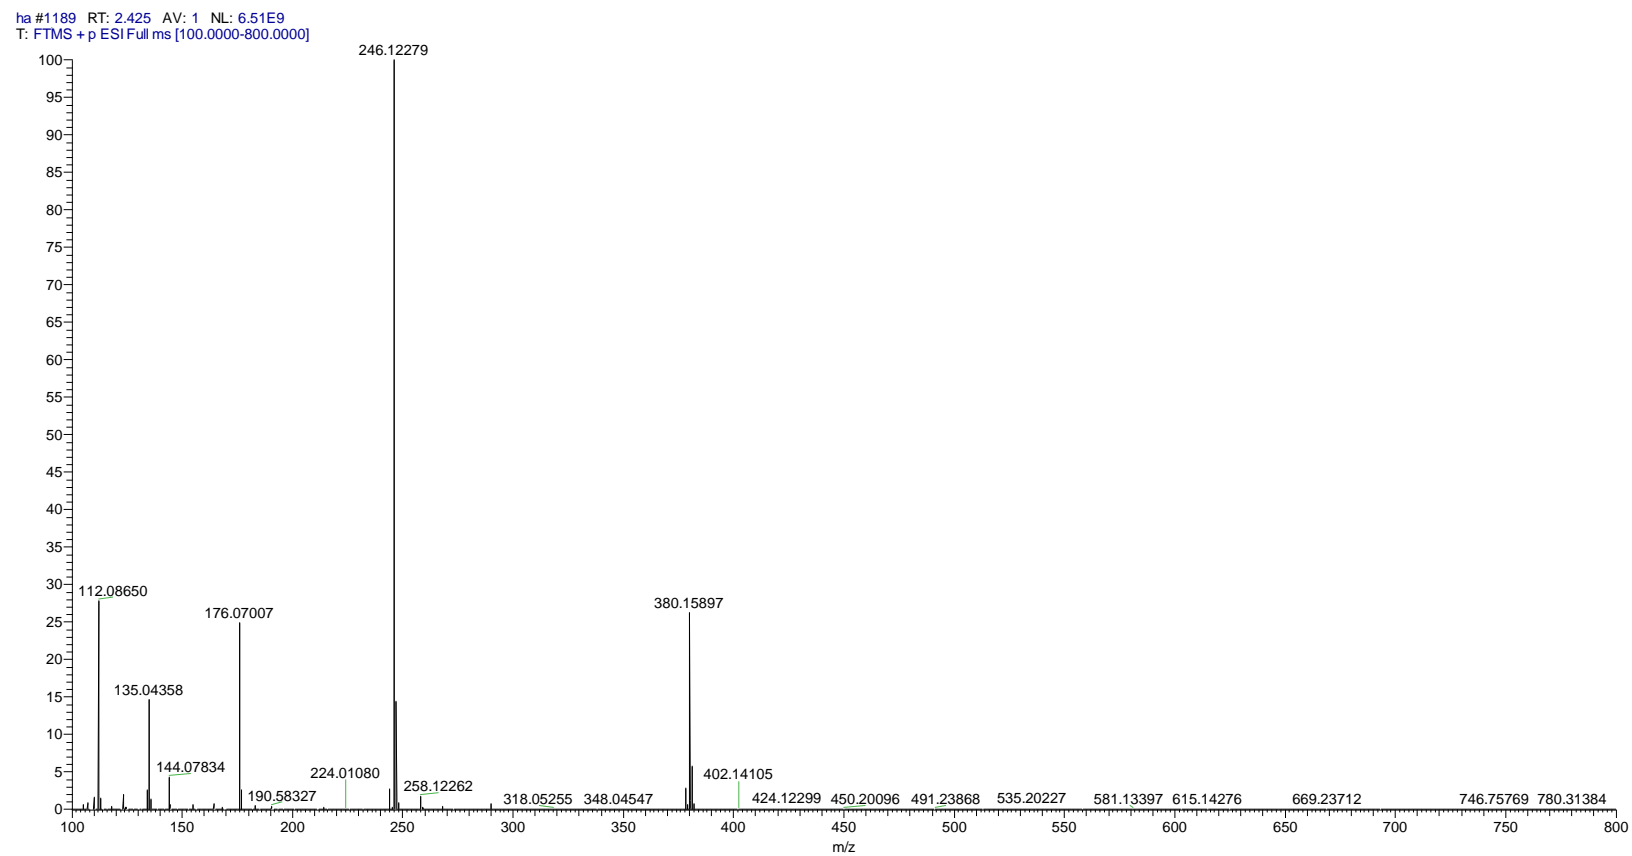

Figure S2. ESI-MS spectrum of hapten HA-245 (positive ion mode)

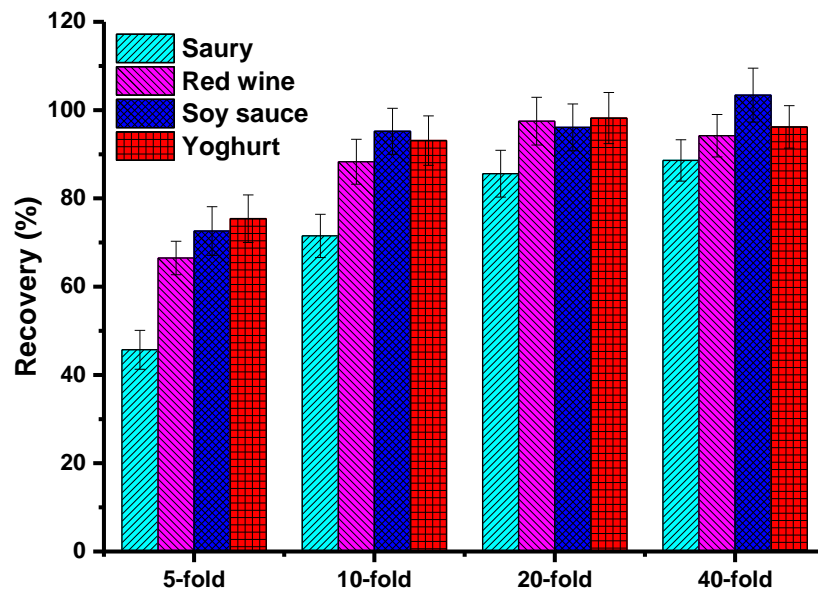

Figure S3. Effect of different matrix dilution factors on recoveries of HA from the saury, red wine, soy sauce and yoghurt samples spiked at 5 mg/kg or 5 mg/L (n=3).

**Table S1.** Effect of physicochemical parameters on ic-ELISA performance (n = 3).

| Parameters                                                | Amax         | IC <sub>50</sub> (mg/L) | Amax/IC <sub>50</sub> |
|-----------------------------------------------------------|--------------|-------------------------|-----------------------|
| <u>Coating concentration (ng/mL)/ antibody</u>            |              |                         |                       |
| <u>dilution</u>                                           |              |                         |                       |
| 2000/1:64000                                              | 1.14 ± 0.018 | 0.56 ± 0.08             | 2.04                  |
| 1000/1:32000                                              | 1.37 ± 0.027 | 0.44 ± 0.07             | 3.11                  |
| 500/1:16000                                               | 1.25 ± 0.022 | 0.34 ± 0.07             | 3.68                  |
| 250/1:8000                                                | 1.03 ± 0.015 | 0.42 ± 0.06             | 2.45                  |
| <u>PO<sub>4</sub><sup>3-</sup> concentration (mmol/L)</u> |              |                         |                       |
| 5                                                         | 1.44 ± 0.021 | 0.52 ± 0.09             | 2.77                  |
| 10                                                        | 1.42 ± 0.030 | 0.45 ± 0.07             | 3.16                  |
| 20                                                        | 1.22 ± 0.019 | 0.32 ± 0.06             | 3.81                  |
| 40                                                        | 0.96 ± 0.017 | 0.54 ± 0.07             | 1.78                  |
| <u>pH value</u>                                           |              |                         |                       |
| <u>5.6</u>                                                | 1.02 ± 0.017 | 0.44 ± 0.06             | 2.32                  |
| 6.2                                                       | 1.13 ± 0.022 | 0.31 ± 0.05             | 3.65                  |
| 6.8                                                       | 1.17 ± 0.019 | 0.23 ± 0.06             | 5.09                  |
| 7.4                                                       | 1.09 ± 0.020 | 0.34 ± 0.07             | 3.21                  |
| 8.5                                                       | 1.01 ± 0.022 | 0.55 ± 0.08             | 1.83                  |

**Table S2.** Comparison of the blind analysis results for HA by ic-ELISA and LC-MS/MS (n=3)<sup>a</sup>.

| sample               | ic-ELISA<br>(mg/L or mg/kg) | LC-MS/MS<br>(mg/L or mg/kg) |
|----------------------|-----------------------------|-----------------------------|
| saury#1 <sup>b</sup> | 7.82                        | 7.24                        |
| saury#2              | 2.43                        | 2.13                        |
| saury#3              | 12.06                       | 11.4                        |
| saury#4              | 5.21                        | 4.84                        |
| red wine#1           | 2.73                        | 2.41                        |
| red wine#2           | 1.34                        | 1.52                        |
| red wine#3           | ND <sup>c</sup>             | 0.33                        |
| red wine#4           | 3.21                        | 3.52                        |
| soy sauce#1          | 2.58                        | 2.41                        |
| soy sauce#2          | 4.07                        | 4.37                        |
| soy sauce#3          | 2.34                        | 2.08                        |
| soy sauce#4          | 1.82                        | 1.71                        |
| yoghurt#1            | 0.91                        | 0.84                        |
| yoghurt#2            | ND                          | 0.52                        |
| yoghurt#3            | ND                          | 0.18                        |
| yoghurt#4            | ND                          | 0.32                        |

<sup>a</sup>each sample was determined by ELISA and LC–MS/MS three times, respectively.

<sup>b</sup>saury#1 represents the NO.1 saury sample.

<sup>c</sup>ND, not detected. Data were below the LOD of the assay in corresponding sample.

Table S3. Synopsis of conventional linear aliphatic linker contained haptens against histamine, acrylamide, ethyl carbamate and AOZ

| Target                   | Immunizing hapten                                                                   | Immunogen                                                                            | Quality of resulting antibodies                                                                                                           | Reference             |
|--------------------------|-------------------------------------------------------------------------------------|--------------------------------------------------------------------------------------|-------------------------------------------------------------------------------------------------------------------------------------------|-----------------------|
|                          | 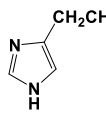   | 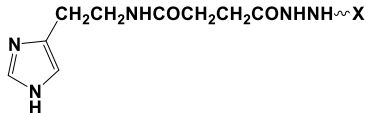   | could not recognize the hapten moiety                                                                                                     | Mita et al, 1984      |
|                          | 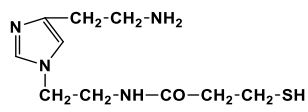   | 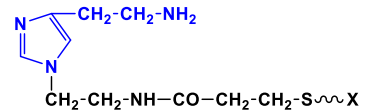   | Affinity constant for HA: $1.0 \times 10^7 \text{ L mol}^{-1}$<br>Affinity constant for 1-Methyl-HA: $1.0 \times 10^8 \text{ L mol}^{-1}$ | Hammar et al, 1990    |
| Histamine<br>(Mw:111 Da) | 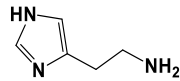   | 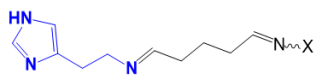   | IC <sub>50</sub> : 520 ng/mL                                                                                                              | Schneider et al, 1996 |
|                          | 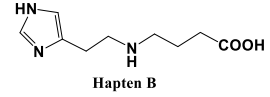 | 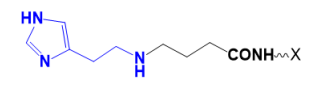 | Titer: 1:4000; and no binding ability with free histamine were observed                                                                   | Luo et al, 2014       |
|                          |  |  | Titer: 1:4000; and no binding ability with free histamine were observed by ic-ELISA                                                       | Luo et al, 2014       |
|                          | 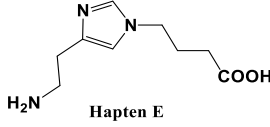 | 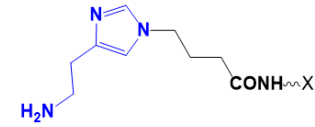 | Titer: 1:4000; and no binding ability with free histamine were observed by ic-ELISA                                                       | Luo et al, 2014       |

| Target                         | Immunizing hapten | Immunogen | Quality of resulting antibodies                                                                                                                                                                                                            | Reference                                        |
|--------------------------------|-------------------|-----------|--------------------------------------------------------------------------------------------------------------------------------------------------------------------------------------------------------------------------------------------|--------------------------------------------------|
|                                | <p>NAS</p>        |           | <p>Affinity constant: <math>6.7 \times 10^7 \text{ L mol}^{-1}</math><br/> Detection limit of BA-ELISA: 6 ng/mL</p> <p>Titer: 1:8000<br/> no binding ability with free acrylamide were observed by ic-ELISA</p>                            | <p>Zhou et al, 2008</p> <p>Wu et al, 2014</p>    |
| Acrylamide<br>(Mw: 71 Da)      |                   |           | <p>no significant binding to free acrylamide</p> <p>Titer: 1:4000<br/> no binding ability with free acrylamide were observed by ic-ELISA</p> <p>Titer: 1:256000<br/> no binding ability with free acrylamide were observed by ic-ELISA</p> | <p>Preston et al, 2008</p> <p>Wu et al, 2014</p> |
| Ethyl carbamate<br>(Mw: 89 Da) |                   |           | <p>Titer: 1:4000<br/> no binding ability with free ethyl carbamate were observed by ic-ELISA</p>                                                                                                                                           | <p>Luo et al, 2017</p>                           |
| AOZ<br>(Mw:102 Da)             |                   |           | <p>no binding ability with free AOZ were observed by ic-ELISA</p>                                                                                                                                                                          | <p>Diblikova et al, 2006</p>                     |

| Target             | Immunizing hapten                                                                 | Immunogen                                                                          | Quality of resulting antibodies                               | Reference             |
|--------------------|-----------------------------------------------------------------------------------|------------------------------------------------------------------------------------|---------------------------------------------------------------|-----------------------|
| AOZ<br>(Mw:102 Da) | 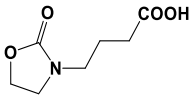 | 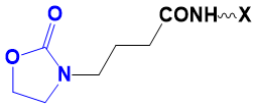 | no binding ability with free AOZ were<br>observed by ic-ELISA | Diblikova et al, 2006 |

X represents the carrier if any

## References

- Mita, H.; Yasueda, H.; Shida, T.; Baba, S., An attempt to produce an antibody of histamine and histamine derivatives. *Agents and actions* 1984, 14 (5-6), 574-579.
- Hammar, E.; Berglund, A.; Hedin, A.; Norrman, A.; Rustas, K.; Ytterstrom, U.; Akerblom, E., An immunoassay for histamine based on monoclonal antibodies. *Journal of immunological methods* 1990, 128 (1), 51-58.
- Schneider, E. U., E.; Martlbauer, E., Production and Characterization of Antibodies Against Histamine. In *In Immunoassays for Residue Analysis: Food Safety*, Beier, R. C., Stanker, L. H., , Ed. ACS Symposium Series 621: American Chemical Society: Washington, DC,, 1996; pp 413-420.
- Luo, L.; Xu, Z.-L.; Yang, J.-Y.; Xiao, Z.-L.; Li, Y.-J.; Beier, R. C.; Sun, Y.-M.; Lei, H.-T.; Wang, H.; Shen, Y.-D., Synthesis of Novel Haptens and Development of an Enzyme-Linked Immunosorbent Assay for Quantification of Histamine in Foods. *Journal of Agricultural and Food Chemistry* 2014, 62 (51), 12299-12308.
- Zhou, S.; Zhang, C.; Wang, D.; Zhao, M., Antigen synthetic strategy and immunoassay development for detection of acrylamide in foods. *Analyst* 2008, 133 (7), 903-909.
- Preston, A.; Fodey, T.; Elliott, C., Development of a high-throughput enzyme-linked immunosorbent assay for the routine detection of the carcinogen acrylamide in food, via rapid derivatisation pre-analysis. *Anal. Chim. Acta* 2008, 608 (2), 178-185.
- Wu, J.; Shen, Y. D.; Lei, H. T.; Sun, Y. M.; Yang, J. Y.; Xiao, Z. L.; Wang, H.; Xu, Z. L., Hapten Synthesis and Development of a Competitive Indirect Enzyme-Linked Immunosorbent Assay for Acrylamide in Food Samples. *Journal of Agricultural and Food Chemistry* 2014, 62 (29), 7078-7084.
- Luo, L.; Lei, H.-T.; Yang, J.-Y.; Liu, G.-L.; Sun, Y.-M.; Bai, W.-D.; Wang, H.; Shen, Y.-D.; Chen, S.; Xu, Z.-L., Development of an indirect ELISA for the determination of ethyl carbamate in Chinese rice wine. *Anal. Chim. Acta* 2017, 950, 162-169.
- Diblikova, I.; Cooper, K. M.; Kennedy, D. G.; Franek, M., Monoclonal antibody-based ELISA for the quantification of nitrofuran metabolite 3-amino-2-oxazolidinone in tissues using a simplified sample preparation. *Anal. Chim. Acta* 2005, 540 (2), 285-292.

Kane, M. M.; Banks, J. N. Raising Antibodies. In *Immunoassays: A Practical Approach*; Gosling, J. P., Ed.; Oxford University Press: Oxford, United Kingdom, 2000; pp 37–50.
